# Supplementary material
Source: Springer Nature journal article supplement (https://www.springermedizin.de/resource/supplementary/12963_2011_135_MOESM3_ESM.pdf/9572730)
Supplement: MOESM3 [file 9572730]

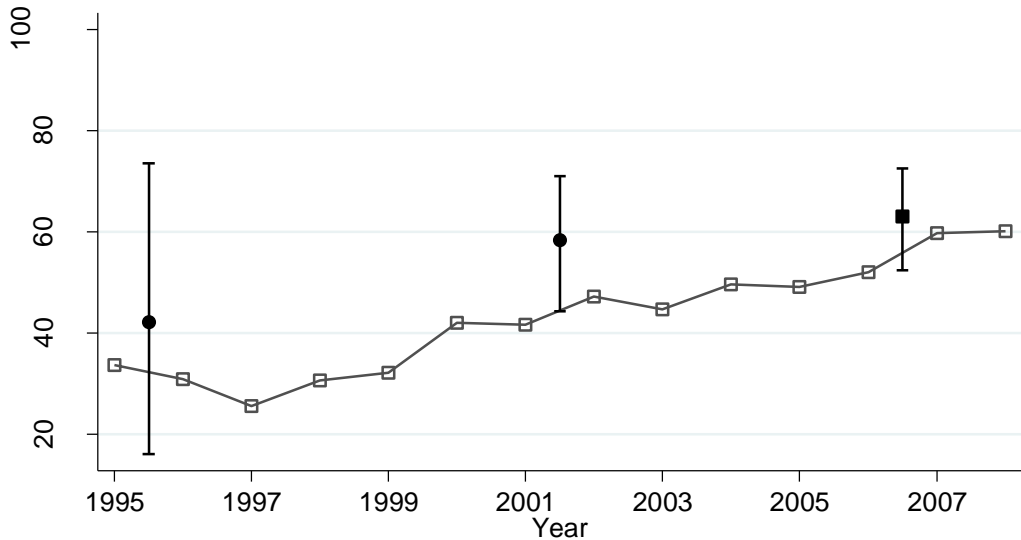

- DHS Estimate with 95% CI
- MICS Estimate with 95% CI
- HIS Data

\*Survey estimates plotted at the mid-point of the two years they represent
